# Supplementary material
Source: publisher figshare collection journal article supplement (https://geolsoc.figshare.com/ndownloader/files/23295458)
Supplement: Supplementary file 1 [file 23295458]

## Sheet: Biotite
Sample	MR	MR		MMR	MMR	MMR	MMR	MMR	MMR	MMR	MMR	MMR		MMR	MMR	MMR	MMR	MMR		MMR	MMR	MMR	MMR	MMR
	Migmatitic xenolith			granulitic xenolith
analysis No.	MR4-23	MR4-24		MMR1-1-5	MMR1-2-2	MMR1-2-3	MMR1-2-1	MMR1-1-4	MMR2-1-8	MMR2-1-9	MMR2-1-10	MMR2-1-13		MMR1-1-1	MMR1-1-2	MMR2-1-1	MMR2-1-14	MMR1-2-4		MMR2-2-1	MMR2-2-2	MMR2-2-3	MMR2-2-4	MMR2-2-5
	brown	brown		brown	brown	brown	brown	brown	brown	brown	brown	brown		green	green	green	green	green		Bt (core) in Am	Bt (rim) in Am	Bt in Am	Bt in Am	Bt in Am
Na2O	0.7602	0.7117		0.4314	0.6068	0.4182	0.3994	0.5107	0.4606	0.5528	0.4579	0.5249		0.4984	0.465	0.4716	0.5651	0.3239		0.3781	0.4052	0.3906	0.3253	0.311
MgO	17.7552	17.6573		16.2856	14.9061	15.2883	16.3659	16.2083	17.1332	16.976	17.0979	16.561		16.871	16.5882	16.2709	16.45	15.7182		15.9688	16.7476	16.7324	16.9218	18.1674
Al2O3	17.4438	17.4664		18.0454	17.3392	17.6181	16.7193	18.2835	18.3379	18.2463	18.0586	17.9992		18.137	18.1099	18.333	18.5932	17.0631		14.585	14.7629	14.8444	14.2739	14.1318
SiO2	36.3577	35.9492		35.2334	36.2961	36.1935	36.375	35.6971	36.2243	36.3109	36.3045	35.9185		34.8138	36.3082	35.6888	35.7998	35.1783		36.1938	36.5833	36.9916	36.6606	37.0369
K2O	8.7632	8.9316		9.3456	9.315	9.258	9.3617	9.1711	9.3043	9.2584	9.2153	9.2142		9.1455	9.2028	9.0547	9.3362	9.0138		9.4112	9.1009	9.5477	9.4243	9.4173
CaO	0	0.0158		0	0.0243	0.0024	0.0231	0	0.0037	0	0.0159	0.0195		0.0317	0	0.0341	0.0146	0.0036		0	0	0.0352	0.0231	0.0195
TiO2	3.4938	3.9706		1.6732	1.4708	1.4669	1.6017	1.6965	1.3365	1.2425	1.1856	1.6925		1.6396	1.7702	1.8118	1.6211	1.5657		4.4435	4.4549	4.4354	4.3137	4.4499
Cr2O3	0.212	0.0966		0.0397	0	0	0	0	0.005	0	0	0		0	0	0.0299	0	0		0.0449	0	0.05	0.0752	0
Mno	0.0684	0.0576		0.1904	0.1605	0.2156	0.1946	0.0748	0.1102	0.1131	0.1297	0.1672		0.0907	0.0683	0.1604	0.031	0.3277		0.1281	0.183	0.1225	0.0858	0.1309
FeO	10.2542	9.8486		13.9887	15.464	15.3765	13.9999	13.3729	12.5369	12.8689	12.6089	12.5965		13.239	13.0183	12.9102	12.7288	14.5022		13.5236	12.4159	12.5346	11.7854	11.291
BaO				0.2987	0	0.0425	0.0853	0.2563	0	0.1928	0.1286	0.0643		0.1069	0.1283	0.3845	0.0214	0.1064		0.4899	0.32	0.3629	0.342	0.1286
F				0.1303	0.1111	0.1204	0.3457	0.0001	0.0001	0.2059	0.5716	0.1416		0.3083	0.1411	0.1689	0.2167	0.6681		0.5428	0.1926	0.3179	0.753	0.6412
Cl				0.064	0.0724	0.1279	0.1067	0.1517	0.1542	0.1178	0.1092	0.0877		0.0641	0.0706	0.1303	0.1069	0.1193		0.1419	0.1614	0.1146	0.1422	0.1277
Totale	95.1085	94.7054		95.7264	95.7663	96.1283	95.5783	95.423	95.6069	96.0854	95.8837	94.9871		94.946	95.8709	95.4491	95.4848	94.5903		95.8516	95.3277	96.4798	95.1263	95.8532
Si	2.65755	2.63845		2.62176	2.70608	2.68639	2.70279	2.64864	2.66499	2.66537	2.66505	2.66425		2.5982	2.6693	2.64299	2.64182	2.65076		2.69602	2.71468	2.71749	2.72319	2.71804
Ti	0.192094	0.219202		0.0936516	0.0824828	0.0818972	0.0895201	0.0946832	0.0739594	0.0686035	0.0654655	0.0944311		0.0920424	0.0978916	0.100926	0.0899833	0.0887427		0.248968	0.248659	0.245091	0.241023	0.245641
Al	1.50274	1.51084		1.58256	1.52358	1.54118	1.46414	1.59884	1.59001	1.57852	1.56237	1.5735		1.5953	1.56915	1.60012	1.61708	1.51534		1.28042	1.29111	1.28524	1.24962	1.22229
Cr	0.0122517	0.00560547		0.00233563	0	0	0	0	0.000290831	0	0	0		0	0	0.0017507	0	0		0.0026443	0	0.00290409	0.00441644	0
Fe2+	0.62682	0.604491		0.870505	0.96418	0.954448	0.869943	0.829796	0.771332	0.789983	0.774066	0.781381		0.826289	0.800394	0.799563	0.785536	0.91387		0.842437	0.770497	0.770071	0.732115	0.692962
Mn	0.00423474	0.0035807		0.0120003	0.0101354	0.0135542	0.0122472	0.00470086	0.00686692	0.00703183	0.00806437	0.0105046		0.00573342	0.00425304	0.0100613	0.00193763	0.020915		0.0080821	0.011502	0.0076223	0.00539824	0.00813666
Mg	1.93473	1.93194		1.80655	1.65673	1.69164	1.81283	1.79282	1.87907	1.85765	1.8711	1.83127		1.87702	1.81803	1.79632	1.80966	1.76566		1.77325	1.85267	1.83245	1.87385	1.98757
Ca	0	0.00124244		0	0.00194108	0.000190857	0.00183899	0	0.000291645	0	0.00125055	0.0015497		0.00253476	0	0.00270568	0.00115434	0.00029064		0	0	0.00277054	0.00183844	0.00153325
Na	0.107736	0.101275		0.0622393	0.0877147	0.0601824	0.0575393	0.0734686	0.0657	0.0786746	0.0651721	0.0754883		0.0721182	0.0662816	0.0677149	0.0808527	0.0473208		0.0546063	0.0582978	0.0556344	0.04685	0.0442515
K	0.817159	0.836272		0.887164	0.885975	0.876627	0.887407	0.8681	0.873247	0.866991	0.863004	0.871912		0.870736	0.863122	0.855454	0.878924	0.866485		0.89432	0.861548	0.894791	0.893072	0.881669
Ba	0	0		0.00870981	0	0.00123613	0.00248367	0.00745202	0	0.00554578	0.00369932	0.00186897		0.00312632	0.0036962	0.0111582	0.000618831	0.00314175		0.0142999	0.00930512	0.0104469	0.00995499	0.00369826
F	0	0		0.0306638	0.0261962	0.0282624	0.0812369	2.34657e-05	2.32669e-05	0.0477992	0.132703	0.0332173		0.0727676	0.0328068	0.0395583	0.0505738	0.159214		0.127871	0.0451998	0.0738582	0.176896	0.148819
Cl	0	0		0.00807097	0.00914802	0.0160886	0.0134364	0.0190758	0.0192259	0.0146546	0.0135855	0.0110246		0.00810749	0.00879642	0.0163537	0.0133693	0.015235		0.0179135	0.0202978	0.0142678	0.0179014	0.0158825
ASite	0.924895	0.938789		0.949403	0.975631	0.937	0.946786	0.941568	0.939239	0.945666	0.929427	0.94895		0.945389	0.929403	0.925874	0.960931	0.914097		0.948926	0.919846	0.953196	0.941761	0.927454
XMg	0.755296	0.761676		0.674827	0.632121	0.639298	0.675731	0.683599	0.708975	0.701627	0.707365	0.700924		0.694342	0.694322	0.691988	0.697312	0.658943		0.677929	0.706272	0.704105	0.719062	0.741483

## Sheet: Garnet
Sample	MR	MR	MR	MR	MR	MR	MR	MR	MR	MR	MR		MR	MR
	Migmatitic xenolith												Migmatitic xenolith
analysis No.	MR4-1	MR4-2	MR4-3	MR4-4	MR4-5	MR4-6	MR4-7	MR4-8	MR4-9	MR4-10	MR4-11		MR1-13	MR1-14
	Garnet profile from core to rim
	Grt core 1	Grt 2	Grt 3	Grt 4	Grt 5	Grt 6	Grt 7	Grt 8	Grt 9	Grt 10	Grt rim 11		Grt rim 57	Grt core 58
SiO2	37.2202	36.6687	37.3406	37.0149	37.2129	37.699	36.8406	37.1506	36.9761	36.7753	37.1524		37.487	37.5163
TiO2	0.0059	0	0.0106	0	0	0.0248	0	0.0201	0	0	0.0283		0.0154	0.0225
Al2O3	21.2378	21.7691	21.443	21.4605	21.5121	21.2509	21.5103	21.8664	21.59	21.73	21.6335		21.7758	21.5734
Cr2O3	0.0215	0.0517	0.0086	0	0.069	0.082	0.0258	0	0.0258	0.0732	0		0	0.0604
FeO	35.5756	35.4281	35.6447	35.4052	35.3402	35.5164	36.1399	35.5432	35.5748	35.5787	36.5834		34.869	36.2491
MnO	1.2054	1.4979	1.4927	1.4722	1.548	1.4933	1.4396	1.4037	1.2613	1.3434	1.0343		1.0507	1.1481
MgO	4.194	4.286	4.2558	4.2863	4.2642	4.3144	4.0991	4.2518	4.0938	4.1144	4.3281		5.0896	4.2687
CaO	0.8722	0.8522	0.8384	0.8773	0.8544	0.8991	0.7872	0.8157	0.8421	0.875	0.8839		0.9028	0.9282
	0	0.0253	0	0.0083	0.0402	0.0608	0.0093	0	0.0211	0	0.0119		0	0
	0	0	0.0395	0.0154	0	0	0.01	0	0	0.0089	0.0024		0	0.0309
Total	100.333	100.554	101.034	100.516	100.801	101.28	100.842	101.052	100.364	100.49	101.644		101.19	101.767
Si(IV)	5.95605	5.86376	5.93761	5.91629	5.92735	5.97358	5.88916	5.90029	5.91716	5.88342	5.88701		5.91516	5.92667
Al(IV)	0.0439474	0.136239	0.0623851	0.0837139	0.0726493	0.0264192	0.110837	0.0997142	0.0828399	0.116577	0.112987		0.0848445	0.0733321
T site	6	6	6	6	6	6	6	6	6	6	6		6	6
Al(VI)	4.00539	4.10277	4.01857	4.04267	4.03837	3.96861	4.05256	4.09299	4.07193	4.09722	4.04009		4.04963	4.01666
Ti(VI)	0.000709991	0	0.00126753	0	0	0.00295514	0	0.00240062	0	0	0.00337222		0.00182737	0.00267297
Cr	0.00272016	0.00653653	0.0010812	0	0.00868945	0.0102729	0.00326079	0	0.00326428	0.00925893	0		0	0.00754403
O site	4.00882	4.1093	4.02092	4.04267	4.04706	3.98183	4.05582	4.09539	4.0752	4.10648	4.04346		4.05146	4.02688
Fe2+	4.76089	4.73789	4.74004	4.73255	4.70752	4.70641	4.83136	4.72084	4.76092	4.76014	4.84784		4.6013	4.78899
Mn2+	0.163379	0.202885	0.201043	0.199308	0.208845	0.200418	0.194919	0.188828	0.170961	0.182039	0.138816		0.140427	0.153623
Mg	1.0005	1.02174	1.00884	1.02132	1.01254	1.01914	0.976841	1.00667	0.976624	0.981271	1.02238		1.19723	1.0053
Ca	0.149539	0.146009	0.142837	0.150238	0.14581	0.152641	0.134825	0.138802	0.144382	0.149982	0.150061		0.152628	0.157105
A site	6.07431	6.10852	6.09275	6.10342	6.07472	6.07861	6.13795	6.05515	6.05288	6.07343	6.1591		6.09159	6.10501
XAlm	0.783775	0.775619	0.77798	0.775393	0.774937	0.774258	0.78713	0.779641	0.786554	0.783764	0.787102		0.755354	0.784435
XSps	0.0268968	0.0332134	0.0329971	0.0326551	0.0343794	0.0329711	0.0317564	0.0311848	0.0282445	0.029973	0.0225384		0.0230526	0.0251634
XPrp	0.16471	0.167265	0.16558	0.167336	0.166681	0.16766	0.159148	0.166251	0.161349	0.161568	0.165996		0.196538	0.164668
XGrs	0.0246182	0.0239025	0.0234437	0.0246153	0.0240027	0.0251111	0.0219658	0.022923	0.0238534	0.0246948	0.0243642		0.0250556	0.0257338
Fe/(Fe+Mg)	0.826344	0.822603	0.824516	0.822498	0.822984	0.822001	0.831817	0.824239	0.829784	0.829089	0.825836		0.793529	0.826502

## Sheet: Feldspar
Sample	MR	MR	MR	MR	MR	MR	MR	MR		MR	MR	MR	MR	MR	MR	MR	MR	MR		MR	MR		MMR	MMR	MMR	MMR
Migmatitic xenolith (leucosome)										Migmatitic xenolith (melanosome)										symplectites with Bt			Granulitic xenolith
analysis No.	MR1-2	MR1-5	MR1-6	MR1-7	MR1-8	MR1-3	MR1-4	MR1-9		MR1-1	MR4-12	MR4-13	MR4-15	MR4-17	MR4-18	MR1-10	MR1-11	MR1-12		MR4-22	MR4-14		MMR2-13	MMR2-14	MMR2-16	MMR2-12
SiO2	65.2321	64.821	60.4379	60.0563	60.265	60.9912	61.0378	64.6934		60.8537	58.228	59.1371	64.9914	60.6534	61.0085	60.3242	59.9206	64.9036		65.6635	59.9435		57.3169	59.704	52.6328	57.335
TiO2	0	0.0026	0	0.0301	0	0.0078	0	0.0171		0.0157	0.03	0	0.0013	0.013	0.0248	0	0	0.021		0.0904	0		0	0.0196	0.1082	0.0026
Al2O3	19.0661	19.2598	24.8836	24.5872	24.9447	24.3128	24.0578	18.7618		23.9303	24.4157	25.1586	21.2696	23.8419	24.4019	25.0279	25.0024	19.2883		18.8754	24.534		26.5698	25.0363	0.8769	26.6438
Cr2O3	0	0.0553	0	0	0	0	0.005	0		0.0201	0.0601	0	0	0	0	0	0.0251	0		0.0201	0		0.0251	0	0.0294	0.0301
FeO	0	0.0762	0	0.0509	0.0414	0.0159	0.0064	0.0127		0.0636	0.0063	0.0222	0.1841	0.1238	0.0985	0.0095	0.035	0.0254		0.3239	0.0667		0.1303	0.0985	10.5336	0.2447
MnO	0	0	0.0883	0	0.0258	0.0368	0	0		0.0074	0	0.022	0	0	0.0257	0	0.0589	0.0184		0	0		0	0	0.608	0.0037
MgO	0.0206	0.0008	0	0	0.0078	0	0	0.0078		0.0093	0.0002	0	0	0.0082	0.0329	0.0134	0.0008	0		0.0045	0.0131		0.0016	0.0247	12.3389	0.0219
CaO	0.2057	0.2434	6.1412	5.9015	5.9868	5.4173	5.3921	0.2509		5.442	6.174	6.6182	2.233	5.0898	5.2876	5.9646	6.1006	0.1904		0.1319	6.0024		8.5288	6.5416	21.4576	8.2046
Na2O	3.9365	3.556	7.9128	7.8732	7.9061	8.1926	8.2261	3.7105		8.0858	7.8068	7.9903	9.3462	8.3652	8.348	8.0484	7.7307	3.6493		5.0496	8.0846		6.5083	7.5374	1.0411	6.6835
K2O	10.6582	10.9892	0.7772	0.6339	0.6574	0.7333	0.7997	10.7016		0.7605	0.5918	0.555	1.5201	0.5841	0.7823	0.7127	0.8491	10.9253		9.4699	0.6404		0.3039	0.4164	0.0086	0.4081
Total	99.1192	99.0043	100.241	99.1331	99.835	99.7077	99.5249	98.1558		99.1884	97.3129	99.5034	99.5457	98.6794	100.01	100.101	99.7232	99.0217		99.6292	99.2847		99.3847	99.3785	99.6351	99.578
Si	2.98142	2.97101	2.6908	2.69875	2.69048	2.7223	2.72978	2.98651		2.73058	2.67251	2.65816	2.88589	2.73327	2.71747	2.6875	2.68215	2.97237		2.98114	2.69391		2.58493	2.67733	2.65258	2.58291
Ti	0	8.96154e-05	0	0.00101717	0	0.000261809	0	0.000593637		0.000529772	0.00103545	0	4.34099e-05	0.000440546	0.000830706	0	0	0.000723226		0.00308637	0		0	0.00066096	0.00410073	8.80814e-05
Al	1.02702	1.04039	1.30569	1.30217	1.3125	1.27897	1.26806	1.02078		1.26553	1.32073	1.33279	1.11311	1.26626	1.28102	1.31413	1.319	1.04108		1.00997	1.29947		1.41225	1.3232	0.0520857	1.41463
T site	4.00845	4.01149	3.99649	4.00194	4.00298	4.00153	3.99785	4.00789		3.99664	3.99427	3.99095	3.99905	3.99997	3.99932	4.00163	4.00115	4.01417		3.9942	3.99338		3.99718	4.00119	2.70877	3.99763
Cr	0	0.00200396	0	0	0	0	0.000176797	0		0.000713083	0.00218091	0	0	0	0	0	0.000888293	0		0.00072149	0		0.000894986	0	0.00117148	0.00107209
Fe2+	0	0.00292078	0	0.00191284	0.00154568	0.000593502	0.000239368	0.000490302		0.00238661	0.000241816	0.000834507	0.00683651	0.00466556	0.00366917	0.000353946	0.00131018	0.0009728		0.0122977	0.00250682		0.00491436	0.00369395	0.443962	0.00921892
Mn2+	0	0	0.0033298	0	0.000975596	0.00139124	0	0		0.000281246	0	0.000837586	0	0	0.000969603	0	0.0022331	0.000713736		0	0		0	0	0.0259539	0.000141181
Mg	0.00140358	5.46622e-05	0	0	0.00051912	0	0	0.000536793		0.000622099	1.36844e-05	0	0	0.00055087	0.00218464	0.00088996	5.33833e-05	0		0.000304565	0.000877649		0.000107571	0.00165122	0.927038	0.00147076
Ca	0.0100729	0.0119527	0.292943	0.284135	0.286363	0.259066	0.258372	0.0124097		0.261628	0.303607	0.318727	0.106236	0.245745	0.252343	0.284706	0.292575	0.0093424		0.00641595	0.289017		0.412109	0.314297	1.15865	0.396009
Na	0.348835	0.316007	0.683044	0.685966	0.684343	0.708986	0.713297	0.332111		0.703458	0.694716	0.696355	0.804649	0.730887	0.720949	0.695206	0.670922	0.324034		0.44449	0.704444		0.56909	0.65534	0.101731	0.583769
K	0.621448	0.642559	0.0441431	0.0363399	0.0374415	0.0417551	0.0456263	0.630248		0.0435337	0.0346514	0.0318253	0.0861103	0.0335794	0.0444536	0.0405063	0.0484868	0.638302		0.548482	0.0367156		0.0174846	0.0238214	0.000552929	0.0234539
A site	0.981759	0.975498	1.02346	1.00835	1.01119	1.01179	1.01771	0.975795		1.01262	1.03541	1.04858	1.00383	1.01543	1.02457	1.02166	1.01647	0.973364		1.01271	1.03356		1.0046	0.998804	2.65906	1.01513
%An	1.02747	1.23158	28.7162	28.2317	28.4049	25.655	25.3979	1.2731		25.9392	29.3915	30.4446	10.6556	24.3261	24.7943	27.9009	28.911	0.961471		0.641988	28.0551		41.2652	31.6366	91.8882	39.4733
%Ab	35.5825	32.5606	66.9566	68.1576	67.8812	70.2101	70.117	34.0708		69.7446	67.2539	66.5155	80.7074	72.3499	70.8378	68.1295	66.2977	33.3479		44.4762	68.3809		56.984	65.9655	8.0679	58.1888
%Kfs	63.3901	66.2078	4.32721	3.61073	3.71389	4.13496	4.48506	64.6561		4.31617	3.35453	3.03993	8.63699	3.32399	4.36785	3.96958	4.79127	65.6907		54.8818	3.56401		1.75076	2.39783	0.0438509	2.33784

## Sheet: Amphibole
Sample	MR	MR	MR	MR
	granulitic xenolith
analysis No.	MMR2-3	MMR2-4	MMR2-5	MMR2-6
	Hbl - Bt	Hbl core	Hbl	Hbl rim
SiO2	42.2114	41.4585	41.29	41.4399
TiO2	3.3026	3.9216	3.8066	2.4823
Al2O3	11.013	11.4647	11.232	11.4791
Cr2O3	0.0096	0.0577	0	0
MnO	0.2517	0.2339	0.2414	0.2588
FeO	14.2325	13.3064	13.0737	14.2989
MgO	12.709	12.3989	12.5073	12.1487
CaO	11.1382	11.5	11.5903	11.397
Na2O	2.496	2.2313	2.3136	2.3498
K2O	1.1394	1.1194	1.1347	1.1776
Initial Total	98.5034	97.6924	97.1896	97.0321
Fe3+/ΣFe initial	0	0	0	0
Mn3+/ΣMn initial	0	0	0	0
Fe3+/ΣFe used	0	0.068	0.055	0.094
Mn3+/ΣMn used	0	0	0	0
Final wt% values
MnO	0.252	0.234	0.241	0.259
Mn2O3	0	0	0	0
FeO	14.233	12.402	12.355	12.955
Fe2O3	0	1.006	0.799	1.494
H2O+	2.01	2.02	2.02	2.01
Total	100.514	99.8141	99.2895	99.1924
Subgroup of (OH,F,Cl)	Ca	Ca	Ca	Ca
Species	Ti-rich pargasite	Ti-rich pargasite	Ti-rich pargasite	pargasite
T (ideally 8 apfu)
Si	6.263	6.17	6.181	6.229
Al	1.737	1.83	1.819	1.771
T subtotal	8	8	8	8
C (ideally 5 apfu)
Ti	0.369	0.439	0.429	0.281
Al	0.189	0.181	0.163	0.263
Cr	0.001	0.007
Fe3+		0.112	0.089	0.17
Fe2+	1.63	1.51	1.527	1.564
Mg	2.811	2.751	2.791	2.723
C subtotal	5	5	4.999	5.001
B (ideally 2 apfu)
Mn2+	0.032	0.029	0.031	0.033
Fe2+	0.136	0.034	0.02	0.064
Ca	1.771	1.834	1.859	1.836
Na	0.062	0.102	0.09	0.067
B subtotal	2.001	1.999	2	2
A (from 0 to 1 apfu)
Na	0.656	0.541	0.582	0.618
K	0.216	0.213	0.217	0.226
A subtotal	0.872	0.754	0.799	0.844
O (non-W)	22	22	22	22
W (ideally 2 apfu)
OH	2	2	2	2
W subtotal	2	2	2	2
Sum T,C,B,A	15.873	15.753	15.798	15.845
Al (tot)	1.926	2.011	1.982	2.034
P (Mutch et al. 2016) CMP	4.83146	5.19277	5.06788	5.29301

## Sheet: Pyroxene
Sample	MMR	MMR	MMR	MMR	MMR	MMR
	Granulitic xenolith
analysis No.	MMR2-7	MMR2-8	MMR2-9	MMR2-10	MMR2-11	MMR2-15
	Cpx rim	Cpx	Cpx core	Cpx	Cpx rim	Cpx in Hbl
SiO2	52.5192	51.781	50.1172	50.6798	51.1651	52.0728
TiO2	0.1301	0.2768	0.6558	0.6793	0.4772	0.2793
Al2O3	0.9754	1.7331	3.2767	2.6336	2.4195	1.4404
Cr2O3	0.0149	0.0346	0.0098	0.0247	0.0444	0
FeO	7.9857	8.219	9.2674	8.341	8.6685	11.5218
Mno	0.4684	0.4352	0.4229	0.4202	0.4892	0.5741
MgO	13.9807	13.7096	14.0006	13.687	13.5727	11.6183
CaO	23.0603	22.5269	20.07	21.28	21.0975	20.855
Na2O	0.4026	0.4741	0.9255	0.5298	0.6649	1.336
K2O	0.0218	0.0239	0.1644	0	0.0092	0.0105
Totale	99.5591	99.2142	98.9103	98.2754	98.6082	99.7082
Si	1.95947	1.93892	1.87411	1.91468	1.92688	1.95817
Ti	0.00365113	0.00779624	0.0184463	0.0193042	0.013518	0.00790022
Al	0.0428904	0.0764838	0.144411	0.117264	0.10739	0.0638378
Cr	0.000439524	0.00102433	0.000289741	0.00073779	0.00132203	0
Fe3+	0.060586	0.0646177	0.145131	0.0528472	0.0594763	0.101939
Fe2+	0.188581	0.192756	0.144684	0.210685	0.213536	0.2604
Mn	0.0148021	0.0138027	0.0133947	0.0134463	0.0156046	0.0182857
Mg	0.777604	0.765285	0.780483	0.770863	0.762003	0.651313
Ca	0.921814	0.903751	0.804106	0.861369	0.851276	0.840246
Na	0.0291233	0.0344196	0.0671013	0.0388078	0.0485495	0.0974073
K	0.00103761	0.00114168	0.00784275	0	0.000442006	0.000503717
Totale	4	4	4	4	4	4
Fe2O3	2.15796	2.29327	5.15758	1.85889	2.09872	3.60243
FeO	6.04394	6.15549	4.62655	6.66835	6.78005	8.28029
Totale	99.7753	99.444	99.427	98.4616	98.8185	100.069
Wo	46.6102	46.0902	41.4166	44.5251	43.9972	43.0607
En	39.3184	39.0286	40.1999	39.8467	39.3832	33.3783
Fs	12.5988	13.1258	14.9274	13.6223	14.1103	18.5691
Acm	1.47258	1.75536	3.45615	2.00601	2.50922	4.9919
N° Mg	75.733	74.8329	72.922	74.523	73.6224	64.2541
e-	63.037	63.0308	62.7328	62.8649	62.902	63.9977
Cariche	12	12	12	12	12	12
Fe3+/Fetot	24.3154	25.1065	50.0771	20.0534	21.7853	28.1337
Fe2O3 calculated as in Droop
Mineralogical Magazine, 51, 361, 431-435, 1987

## Sheet: Ti in Bt Geothermometer 
Ti-in-biotite geothermometer of Henry et al. (2005) American Mineralogist
a,b and c are surface fit coefficients			Ti and X(Mg) are input data			result
a	b	c	Ti	X(Mg)		T(C)
-2.3594	4.6482e-09	-1.7283	0.384187	0.755296		773.055	MR	781.913
-2.3594	4.6482e-09	-1.7283	0.438405	0.761676		790.77
-2.3594	4.6482e-09	-1.7283	0.187303	0.674827		639.471	MMR brown Bt	617.473
-2.3594	4.6482e-09	-1.7283	0.164966	0.632121		597.979
-2.3594	4.6482e-09	-1.7283	0.163794	0.639298		599.561
-2.3594	4.6482e-09	-1.7283	0.17904	0.675731		631.842
-2.3594	4.6482e-09	-1.7283	0.189366	0.683599		645.023
-2.3594	4.6482e-09	-1.7283	0.147919	0.708975		611.756
-2.3594	4.6482e-09	-1.7283	0.137207	0.701627		593.16
-2.3594	4.6482e-09	-1.7283	0.130931	0.707365		586.554
-2.3594	4.6482e-09	-1.7283	0.188862	0.700924		651.909
-2.3594	4.6482e-09	-1.7283	0.184085	0.694342		644.704	MMR green Bt	644.878
-2.3594	4.6482e-09	-1.7283	0.195783	0.694322		655.155
-2.3594	4.6482e-09	-1.7283	0.201852	0.691988		659.258
-2.3594	4.6482e-09	-1.7283	0.179967	0.697312		642.076
-2.3594	4.6482e-09	-1.7283	0.177485	0.658943		623.195
-2.3594	4.6482e-09	-1.7283	0.497936	0.677929		779.38	MMR Bt - Am	784.931
-2.3594	4.6482e-09	-1.7283	0.497318	0.706272		787.46
-2.3594	4.6482e-09	-1.7283	0.490181	0.704105		785.136
-2.3594	4.6482e-09	-1.7283	0.482046	0.719062		787.748
To use this geothermometer in the most appropriate manner, refer to the Henry et al. (2005) paper or the webpage:
http://geol.lsu.edu/henry/Research/biotite/TiInBiotiteGeothermometer.htm
